## RESEARCH ARTICLE

# Contact between European bison and cattle from the cattle breeders' perspective, in the light of the risk of pathogen transmission

Daniel Klich<sup>1\*</sup>, Anna Didkowska<sup>2</sup>, Anna M. Pyziel-Serafin<sup>2</sup>, Magdalena Perlińska-Teresiak<sup>1</sup>, Aleksandra Wołoszyn-Gałęza<sup>3</sup>, Krzysztof Żoch<sup>4</sup>, Marek Balcerak<sup>5</sup>, Wanda Olech<sup>1</sup>

**1** Department of Animal Genetic and Conservation, Institute of Animal Sciences, Warsaw University of Life Sciences—SGGW, Warsaw, Poland, **2** Department of Food Hygiene and Public Health Protection, Institute of Veterinary Medicine, Warsaw University of Life Sciences (SGGW), Warsaw, Poland, **3** Museum and Institute of Zoology, Polish Academy of Sciences, Ustrzyki Dolne, Poland, **4** Borki Forest District, Kruklanki, Poland, **5** Department of Animal Breeding, Warsaw University of Life Sciences-SGGW, Warsaw, Poland

\* [daniel\\_klich@sggw.edu.pl](mailto:daniel_klich@sggw.edu.pl)

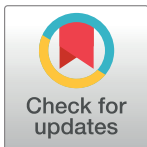

## OPEN ACCESS

**Citation:** Klich D, Didkowska A, Pyziel-Serafin AM, Perlińska-Teresiak M, Wołoszyn-Gałęza A, Żoch K, et al. (2023) Contact between European bison and cattle from the cattle breeders' perspective, in the light of the risk of pathogen transmission. PLoS ONE 18(5): e0285245. <https://doi.org/10.1371/journal.pone.0285245>

**Editor:** Emmanuel Serrano, Universitat Autònoma de Barcelona, SPAIN

**Received:** October 20, 2022

**Accepted:** April 18, 2023

**Published:** May 3, 2023

**Copyright:** © 2023 Klich et al. This is an open access article distributed under the terms of the [Creative Commons Attribution License](https://creativecommons.org/licenses/by/4.0/), which permits unrestricted use, distribution, and reproduction in any medium, provided the original author and source are credited.

**Data Availability Statement:** All relevant data are within the paper and its [Supporting Information](#) files.

**Funding:** WO received the funds from Forest Fund (Poland), contract no. OR.271.3.10.2017. The funder was not involved in the study design; collection, analysis and interpretation of the data; or in writing the manuscript.

**Competing interests:** The authors have declared that no competing interests exist.

## Abstract

Pathogens transmitted between wildlife and domestic animals can pose a threat to endangered species, undermine conservation efforts in wildlife, and affect productivity and parasite control in domestic animals. There are several examples of pathogen transmission between European bison and other animals. The present study surveyed breeders from the vicinity of four large wisent populations in eastern Poland about observed contacts between wisent and cattle. Such contacts were noted by 37% of breeders, indicating a significant risk of contact between European bison and cattle in the study areas, even in the areas where the European bison live mainly in a forest complex, i.e., in the Borecka Forest. A higher potential risk of contacts between European bison and cattle was noted in the Białowieska Forest and the Bieszczady Mountains than in the Borecka and Knyszyńska Forests. In the Białowieska Forest, the risk of viral pathogen transmission resulting from contacts is higher (more direct contacts), and in the case of the Bieszczady Mountains, the probability of parasitic diseases is higher. The chance of contacts between European bison and cattle depended on the distance of cattle pastures from human settlements. Moreover, such contact was possible throughout the year, not only in spring and fall. It appears possible to minimize the risk of contacts between wisent and cattle by changing management practices for both species, such as keeping grazing areas as close as possible to settlements, and reducing the time cattle graze on pastures. However, the risk of contact is much greater if European bison populations are large and are dispersed beyond forest complexes.

## Introduction

Following its return from extinction, the European bison population has continued to grow, and its recent dynamic increase in population [1] has resulted in its status being changed to

NT (near threatened) [2]. However, the current situation of the species continues to require active conservation measures due to the emergence of new threats [3,4].

This rapid growth in population size has been achieved through conservation efforts, but it results in high population densities within residential areas (usually forest complexes), which can lead to easier transmission of pathogens among individuals [5]. In the past, transmission of tuberculosis and currently thelaziasis led to a significant reduction in the number of wisents in southeastern Poland [6,7]. Thelaziasis is an eye disease of wild and domestic animals that eventually results in blindness. It is distributed worldwide by spirurid eyeworms of the genus *Thelazia*, with non-biting secretophagous flies of the genus *Musca* playing the role of intermediate hosts. The symptoms derive from the mechanical irritation of the conjunctiva and cornea, and toxic effects of parasitic metabolites [8,9]. Under pressure from their increasing population density, wisents are increasingly moving beyond the area of forest complexes [10,11]. This is associated with greater foraging on crops, which may cause negative health effects due to pesticides, or deficiencies in certain elements [12,13]. In addition, such foraging on agricultural land is also associated with a higher probability of contact with cattle.

Diseases common to wildlife and domestic animals can pose a threat to endangered species, undermine conservation efforts in wildlife, or interfere with productivity and parasite control in domestic animals. In addition, wildlife is the most likely source of emerging diseases for both humans and animals [14], such as the transmission of SARS-CoV-2 from wildlife to humans and domestic animals [15]. The phenomenon of pathogens being transmitted via wildlife-livestock contacts has been already widely described. For example, in the United States, it was estimated that about 80% of reported livestock diseases have a potential wildlife component [16]. Direct contact often requires temporal and spatial co-location between hosts, while indirect contact requires co-location with a certain time window [17]. When livestock and animal species are susceptible to the same pathogen, controlling disease in one can have an impact on the prevalence in the other. One good example being efforts to control brucellosis in livestock resulted in a lower prevalence in red deer (*Cervus elaphus*) [18]. Interactions with cattle also contribute to the occurrence of brucellosis in elk (*Cervus canadensis*) [19]. Similar associations have been identified for other diseases, such as tuberculosis in the case of free-living African buffalo (*Syncerus caffer*), American bison (*Bison bison*), red deer (*Cervus elaphus*), roe deer (*Capreolus capreolus*), wild boar (*Sus scrofa*) [20–23]. Presence of common wild ungulates on ranches were also noted in African countries [24]. In particular, eland (*Taurotragus oryx*), impala (*Aepyceros melampus*) and waterbuck (*Kobus defassa*) have been associated with a higher risk of wildlife-livestock pathogen transmission [25–27].

Bacterial diseases that occur in cattle may pose a potential threat to European bison in the case of direct contact, but also due to regular grazing on the same pastures. One of the greatest such threats is presented by tuberculosis, partly due to the relatively high environmental resistance of mycobacteria [28,29]. Animal transmission of tuberculosis remains an emerging problem [30,31]. Recent studies have also demonstrated the occurrence of antibodies to pathogens such as Schmallenberg virus (SBV), bluetongue virus (BTV), bovine viral diarrhoea virus (BVDV), bovine herpesvirus type 1 (BoHV-1), *Mycoplasma* spp, *Brucella* spp, bovine adenovirus type 3 (BAdV-3), bovine parainfluenza type 3 (PIV-3), bovine respiratory syncytial virus (BRSV), *Toxoplasma gondii*, *Leptospira* spp. [32–34]. It has been suggested that contact with some of these pathogens may have resulted from contact with cattle [34]. According to Kwiecień et al. [35], cattle and European bison sharing common pastures are subject to a higher risk of *Trueperella pyogenes* transmission. European bison and cattle also share a variety of endoparasites from different classes [36], such as 11 species of protozoan parasites belonging to the genus *Eimeria* [37,38], as well as *Neospora caninum*, *Toxoplasma gondii*, and *Sarcocystis cruzi* [39–42]. Many parasitic nematode species are generalists that can infect multiple host

species [43]. Thanks to the direct life cycle of gastrointestinal nematodes, it is possible for wild and domestic animals sharing the same grazing areas to ingest parasite larvae laid by different species [43]. Both European bison and cattle share the following abomasal nematodes, among others: *Ostertagia ostertagi*, *O. lyrata*, and the bloodsucking *Haemonchus contortus* [44,45]. Another parasite, *Ashworthius sidemi*, is an alien species that was first introduced to Polish wildlife with migrating Asian cervids, and then transferred to the Czech Republic with European bison translocated from Poland [46,47]. Pasture sharing can also lead to transmission of lungworm larvae (*Dictyocaulus viviparus*) between animals; although the parasite demonstrates some genetic variability, it belongs to a single species [37,48–50]. In addition, eyeworm infestations by the spirurid nematodes *Thelazia gulosa* and *T. skrjabini*, are frequently diagnosed in cattle, whereas their distribution to cervids is very limited [6,9].

Hence, it seems important to understand the possible contacts between European bison and cattle which can lead to the transmission of pathogens. Such knowledge would be valuable for protecting European bison and ensuring proper livestock management. Unfortunately, very little information on this topic is currently available in the literature. Many wildlife-borne diseases are known to affect the agricultural economy [e.g. 51] and limiting wildlife-livestock contacts is an important element of disease control strategy [52]. Therefore, it is important to identify mechanisms to minimize potential contacts between European bison and cattle so that they can be used in the event of a threat.

With this in mind, the present study surveys cattle breeders from the vicinity of four large populations of European bison in eastern Poland: the Borecka, Białowieska and Knyszyńska forests and the Bieszczady Mountains. The study was based on four hypotheses: 1) European bison have contact with cattle in all studied populations, but less so in Borecka Forest, where the population roams within the forest complex as a result of management methods. 2) Contacts between European bison and cattle are less frequent when cattle are kept near settlements. 3) Contacts between European bison and cattle occur throughout a few months of the year (spring and autumn). 4) Cattle breeders perceive the contacts between European bison and cattle as a serious threat to them and the cattle.

## Methods

The study was conducted near the four largest populations of European bison in eastern Poland: Białowieska, Borecka and Knyszyńska Forests in northeastern Poland and the Bieszczady Mountains in southeastern Poland (Fig 1). The Białowieska Forest covers an area of about 600 km<sup>2</sup> (52°44'N, 23°47'E), and the European bison was first reintroduced there in 1952. The current population size (including adjacent areas) is estimated at 779 individuals [53]. For many years, European bison have used the areas outside the forest complex, i.e. agricultural land [10], which resulted in severe damage to crops [54]. The Borecka Forest is a dense forest covering an area of about 200 km<sup>2</sup> (54°8'N, 22°8'E), isolated by agricultural land and lakes. The European bison was reintroduced in 1962 and the current population size is estimated at 125 individuals [53]. The population is actively managed and there is no significant agricultural damage [54]. The Knyszyńska Forest covers an area of about 1000 km<sup>2</sup> (53°12'N, 23°28'E) and the European bison was reintroduced in 1974. Currently, the population of this species is estimated at 212 individuals [53]. European bison use the areas outside the forest complex in large numbers and cause considerable damage to agricultural crops [11]. The Bieszczady Mountains cover an area of more than 1,100 km<sup>2</sup> (49°15'N, 22°25'E), but only part of this area is inhabited by the European bison, which were reintroduced in 1963. Unlike the rest of the study area, this area is mountainous and has undergone a significant change from cropland to predominantly woodland [55]. European bison mainly use forest habitats in this

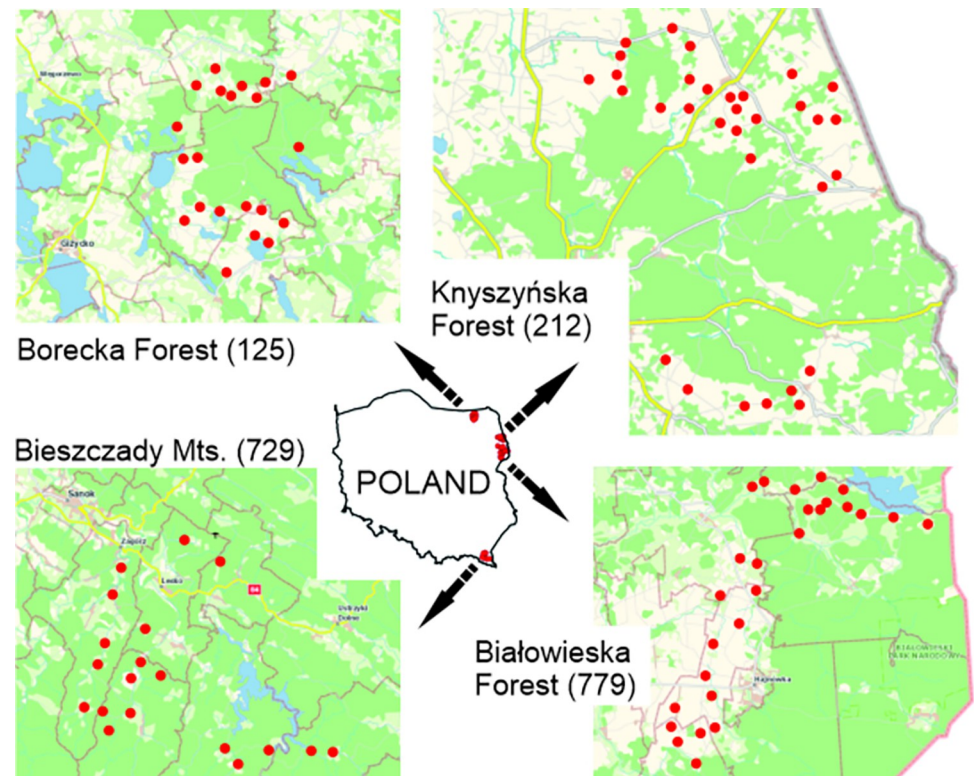

**Fig 1. Locations of the villages where the surveys were conducted in given study area (with the number of European bison in brackets [53]).** Background map was obtained from [Geoportal.gov.pl](https://geoportal.gov.pl).

<https://doi.org/10.1371/journal.pone.0285245.g001>

area, where they cause significant damage [56,57]. In addition, European bison also frequently cause damage to farms [58]. The current population size is estimated at 729 individuals [53].

Questionnaires (direct interviews) were administered to cattle breeders in the four study areas. A total of 208 questionnaires were completed, at least 50 in each study area: 54 in Białowieska Forest, 51 in Borecka Forest, 52 in Knyszyńska Forest, and 51 in Bieszczady Mountains. Respondents were selected using the snowball sampling method, which is suitable for studying hard-to-reach populations [59]. All respondents were informed of the purpose of the survey and principles of data collection, and consciously gave their verbal consent to conduct the survey. Consent was expressed in the presence of a witness, someone from the respondent's family or another third party. If there was no witness, the interviewer certified in writing that oral consent had been obtained from the respondent. Surveys were not linked to respondents' addresses and were anonymous, so no sensitive data were collected. Respondents were not restricted to age (except from being adult) or gender, and the only selection criterion for respondents was that they were owners (or managers) of cattle raised on pasture.

To test the hypotheses, nine questions were prepared for the breeders. The survey was divided into three sections:

- A. basic information (questions 1–5): location of the breeder's home (village), number of cows on the pasture, breed, outdoor grazing time, distance of the pasture from settlements and the nearest forest, method of securing the cattle (e.g. electric fence),
- B. essential information on contacts of European bison with cattle (questions 6–7): whether the breeder observed such contact and how domestic animals reacted to it,

C. risk assessment by the breeder (questions 8–9): questions on the threat of European bison to cattle and humans.

For question 6, "Have you or anyone in your family or your associates observed contact between European bison and cattle?", respondents had a choice of five response categories: 1) No, never (NO CONTACT), 2) European bison were seen in the same pastures as cattle but at different times (SHARING PASTURES), 3) European bison were seen at a distance from cattle (at least 100 m) (AT DISTANCE), 4) European bison were seen in close proximity but separated by a barrier (e.g., a fence) (SEPARATED), 5) European bison were seen in close proximity to cattle without barriers (less than 100m or between animals including mixed herds of cattle and European bison (NEAR). For categories 2 to 5, the respondent was also asked how many times a year and in what time period (in months) each potential contact occurred. If the respondent selected categories 3 to 5 in question 6, conditional question 7 was asked: "If contact was noticed, what type of reactions of cattle was observed?".

Question 8, "Do you think direct contact with European bison poses a risk to cattle or humans?" allowed respondents to choose from five response categories: 1) Definitely not, 2) Rather not, 3) Hard to say, 4) Rather yes, 5) Definitely yes. If the respondent selected categories 4 or 5 in question 8, the conditional open-ended question 9 was asked, "Please indicate the type of risk to livestock and/or humans."

If the breeders declared more than one pasture, they were asked to indicate the most important pasture where the cattle graze most often and where the herd can be observed. In this way, each breeder was limited to one answer. The overall response rate was 92%, with the rates in each individual study areas being 93% in Białowieża Forest, 96% in Bieszczady Mountains, 93% in Borecka Forest and 87% in Knyszyńska Forest. The lack of response to the questionnaires resulted from the inability to contact the breeder (not at home), or that the cattle were kept in closed barns rather than on pasture (in the Knyszyńska forest). None of the breeders refused to answer the questions. The main data obtained in this study is presented in [S1 Table](#).

All data used in the analysis were taken directly from the survey data, including the distance of the pasture to the settlements, which was estimated by the breeders. The survey data were analyzed using a generalized linear model with a logistic link function and a binary response variable. In this model, the dependent variable was the observation of potential contact of European bison with cattle (SHARING PASTURES, AT DISTANCE, SEPARATED, and NEAR, labeled as 1) or the absence of such contact (NO CONTACT, labeled as 0). The explanatory variables in the model were: (A) distance of cattle grazing from human settlements (DIST\_S), distance of cattle grazing from forest habitat (DIST\_F), and study area (SITE). A correlation between DIST\_S and DIST\_F was checked prior to modeling. As the distance of cattle grazing from human settlements was statistically significant, another model was created with the same dependent variable and the distance from human settlements as the sole explanatory variable.

The risk perception was also checked for differences among breeders in the study areas. The Kruskal-Wallis test was used because the dependent variable was not normally distributed. The test used risk perception as a transformed variable (both cattle and human risk) on a five-point Likert scale, i.e., 1) Definitely not, 2) Rather not, 3) Hard to say, 4) Rather yes, 5) Definitely yes.

## Results

In general, 37% (95%CI: 30.4–43.6%) of breeders reported potential contact between European bison and cattle. However, indirect potential contact (SHARING PASTURES) was most frequently reported among contact types (44.2% of all potential contact data; 95%CI: 33.1–

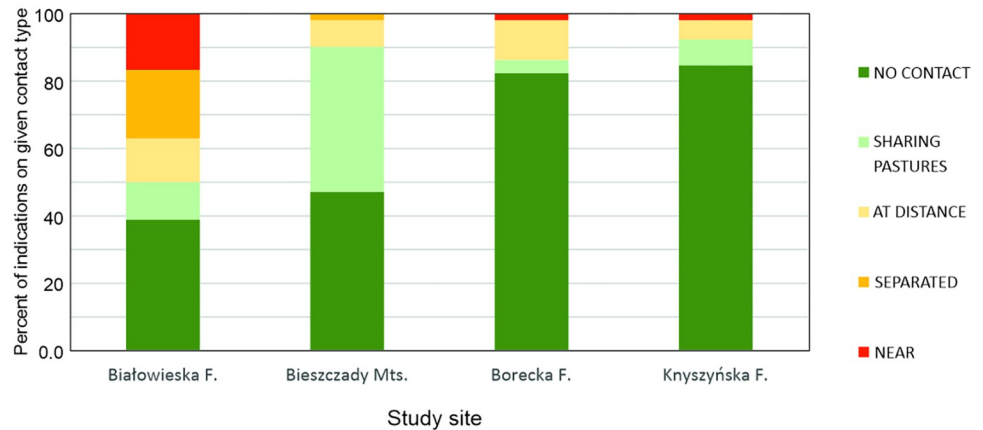

**Fig 2. Percentage of forms of European bison contact with cattle at specific study sites, as reported by cattle breeders (see Methods for a detailed explanation).**

<https://doi.org/10.1371/journal.pone.0285245.g002>

55.3%). The presence of European bison at a considerable distance from cattle (AT DISTANCE) was also frequently indicated (26%; 95%CI: 16.2–35.8%). The other categories (SEPARATED and NEAR) together accounted for nearly 30% (95%CI: 19.6–40.0%) of all potential contacts. However, breeder observations varied across study areas. In the Białowieska Forest, breeders most frequently noticed potential contacts between European bison and cattle (more than 60%; 95%CI: 48.1–74.1%). Moreover, breeders most frequently noticed the presence of European bison among cattle (NEAR) comparing to other potential contact types (Fig 2). In the Bieszczady Mountains, more than 50% (95%CI: 39.2–66.6%) of breeders indicated potential contacts between European bison and cattle and SHARING PASTURES was most frequently noted among the potential contact types (43.1% of all potential contacts, 95%CI: 29.5–56.7%). In other study areas (Borecka and Knyszyńska Forests), potential contacts were observed less frequently (17.6; 95%CI: 7.1–28.1% and 15.4%; 95%CI: 5.6–25.2%, respectively) than in Białowieska and Knyszyńska forests (Fig 2).

The generalized linear binary model indicates that the distance of cattle pastures from human settlements and the study site had a significant influence on the potential contact between European bison and cattle (Table 1), with a greater distance being associated with a higher risk of potential contact. The distance between cattle grazing areas and human settlements could independently explain the risk of potential contact between European bison and cattle. The probability of potential contact was higher than 50% for pastures located 1.5 km from human settlements (Fig 3). However, this effect was not found in relation to the distance of cattle pastures from forest habitat. The frequency of potential contacts was higher in

**Table 1. Influence of distance of cattle grazing from human settlements (DIST\_S) and forest habitats (DIST\_F) and study site (SITE) on probability of potential contact of European bison with cattle in a generalized linear binary model; 0—reference category (overall model:  $\chi^2 = 44.36$ ,  $df = 5$ ,  $p < 0.001$ ).**

| Source                 | B      | SE     | Lower CI | Upper CI | Wald $\chi^2$ | p      |
|------------------------|--------|--------|----------|----------|---------------|--------|
| Intercept              | -1.691 | 0.4349 | -2.544   | -0.839   | 15.120        | <0.001 |
| DIST_S                 | 0.539  | 0.2377 | 0.073    | 1.005    | 5.135         | 0.023  |
| DIST_F                 | -0.081 | 0.1051 | -0.287   | 0.125    | 0.599         | 0.439  |
| SITE (Białowieska F.)  | 1.829  | 0.4916 | 0.866    | 2.793    | 13.847        | <0.001 |
| SITE (Bieszczady Mts.) | 1.581  | 0.5080 | 0.585    | 2.577    | 9.686         | 0.002  |
| SITE (Borecka F.)      | -0.308 | 0.5796 | -1.445   | 0.828    | 0.283         | 0.595  |
| SITE (Knyszyńska F.)   | 0      |        |          |          |               |        |

<https://doi.org/10.1371/journal.pone.0285245.t001>

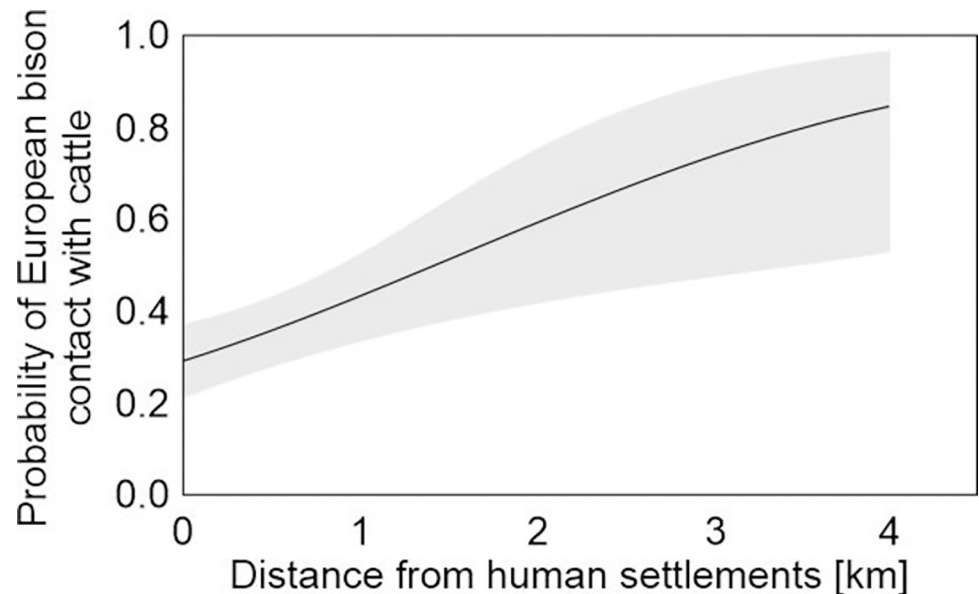

**Fig 3.** Probability (predicted mean and CIs—shaded area) of potential contact of European bison (direct and indirect) with cattle with distance of cattle pastures from human settlements (for the model:  $\chi^2 = 9.77$ ,  $df = 1$ ,  $p = 0.002$ ).

<https://doi.org/10.1371/journal.pone.0285245.g003>

Białowieża Forest and Bieszczady Mountains than in Knyszyńska Forest, but the frequency of potential contacts did not differ between Borecka and Knyszyńska Forests (Table 1).

Cattle were mostly grazed from May to October, although some breeders reported keeping animals year-round (Fig 4). Breeders most frequently indicated that potential contact between European bison and cattle could occur from January through May and from September through December (Fig 4). The highest overlap of cattle on pasture and potential contacts is observed in May, September, and October (Fig 4).

Breeders rated the risk posed by European bison to cattle and humans as moderate (Fig 5). A similar percentage indicated no risk, although they indicated that the threat to cattle was lower than to humans (responses of "Rather yes" and "Definitely yes" accounted for 39.2% (95%CI: 32.5–45.9%) responses for cattle and 42.8% (95%CI: 36.0–49.6%) responses for humans. Among the threats to cattle, breeders primarily indicated the risk of pathogen transmission (43% of responses; 95%CI: 31.8–54.2%) and aggression from European bison (24.4% of responses; 95%CI: 14.7–34.1%). Threats also included scaring cattle, mating with cattle, destroying fences, and reducing the quality of pastures. With respect to humans, all of the

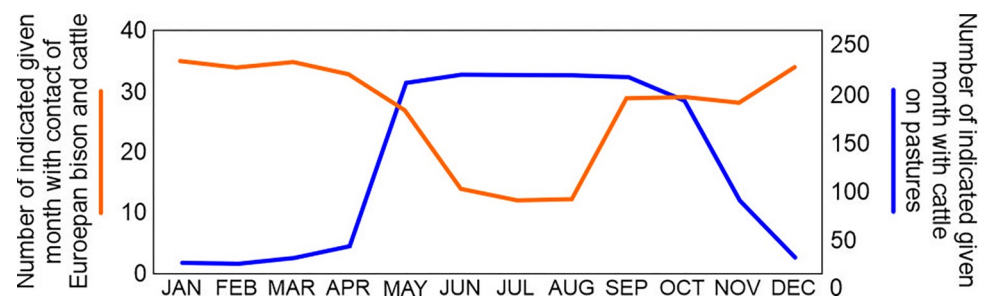

**Fig 4.** The overlap between the presence of cattle on pastures with their potential contact with European bison.

<https://doi.org/10.1371/journal.pone.0285245.g004>

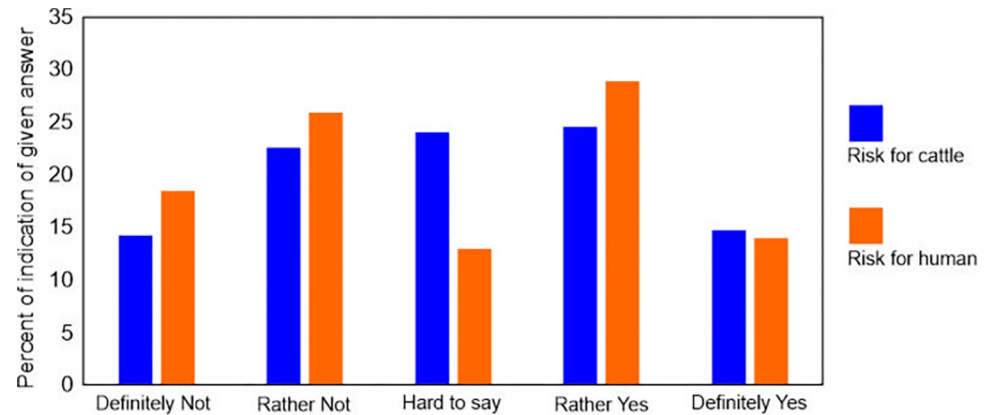

**Fig 5. Percentage of responses to a question, "Do you think direct contact with European bison poses a risk to cattle or humans?"**

<https://doi.org/10.1371/journal.pone.0285245.g005>

breeders who responded to this question feared aggression from European bison. According to the breeders, the cattle usually reacted with fear or interest to the European bison. The lowest risk from the European bison to cattle and humans was reported in the Borecka Forest; respondents from this study area were demonstrated significantly different risk perception compared to all other sites (Fig 6). The breeders in the Bieszczady Mountains also indicated a higher perception of risk for cattle than in the Knyszyńska Forest. In addition, breeders in the Białowieska Forest also indicated a higher perception of risk for humans than in the Knyszyńska Forest (Fig 6).

## Discussion

As expected, our study confirms a substantial risk of contacts between European bison and cattle in the study areas. Nevertheless, not all hypotheses were confirmed. These relationships appear reasonable when considering the management of the European bison population and cattle.

The hypothesis about the risk of contacts between European bison and cattle was confirmed at all sites, but surprisingly, similar risks were noted in the Knyszyńska and Borecka Forests. In the Knyszyńska Forest, European bison often live in open areas and cause significant damage

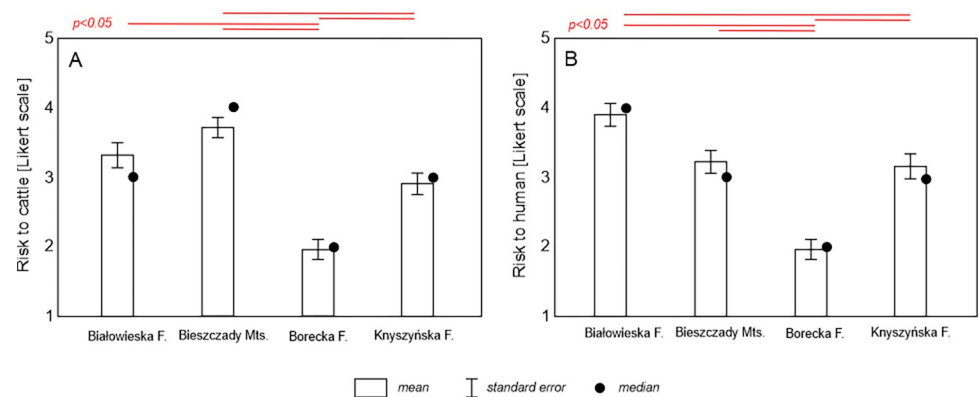

**Fig 6. Cattle (A) and human (B) risk assessment of European bison and pairwise comparison using the Kruskal-Wallis test (red horizontal lines above bars indicate statistically significant differences).**

<https://doi.org/10.1371/journal.pone.0285245.g006>



to agricultural crops [11], while in the Borecka Forest these animals usually remain within a forest complex. However, it seems that this is due to the agricultural characteristics of these areas. The Podlaskie Voivodeship, where the Knyszyńska Forest is located, is characterized by the highest cattle population in Poland [60], but it varies locally. Although there is no detailed information about the cattle population in the studied communes, the local richness of the grazing area can be determined based on the area of pastures in the commune. The communes around the Knyszyńska Forest have a lower share of pasture land than those in the other sites, with pasture accounting for an average of 13% of the agricultural land, compared to about 25.7% around the Borecka Forest [61], 17.7% around the Białowieska Forest and 21.3% for the Bieszczady mountains [61]. It can hence be assumed that the European bison in the Knyszyńska Forest have a much lower chance of encountering cattle on pastures than in other study areas. Therefore, no significant difference in the risk of contact was found between the Knyszyńska Forest and the Borecka Forest.

Our results indicate that even in the areas where European bison live mainly in the forest complex, i.e. Borecka Forest, the risk of contacts between European bison and cattle may also occur. Moreover, the risk of pathogen transmission, resulting from contacts, seems to be higher in the Białowieska Forest and the Bieszczady Mountains. However, the risk of viral pathogen transmission seems to be higher in the case of the Białowieska Forest, due to more direct contacts, and parasitic pathogens are more likely in the Bieszczady Mountains, due to more frequent occurrence in the same pastures at different times. For example, in the case of protozoan parasites of the genus *Eimeria*, transmission occurs easily via sporulated oocysts contaminating pastures and water sources due to their direct life cycle [62]. In addition, some oocysts are able to survive the winter and become infectious at the beginning of the grazing season [48,63]. It is also worth mentioning that the Bieszczady Mountains can be distinguished from the other study areas by their land cover. In the Bieszczady Mountains, villages are located between large forest areas [55,56], which means that even if European bison roam in a forest complex, the relative distance to cattle may be small; however, the breeders did not report seeing European bison. This could indicate fewer estimated contacts between European bison and cattle in our study. For example, the spirurid nematodes *Thelazia gulosa* and *T. skrjabini* are transmitted between hosts (European bison and cattle) via *Musca* flies, which are vectors and intermediate hosts for *Thelazia* spp. [9]. According to Filip-Hutsch et al. [6], cattle may play a role in the transmission of *Thelazia* nematodes to free-living European bison. Individuals of genus *Musca* can fly over a distance of several kilometers [64].

Not surprisingly, our hypothesis indicating that the risk of contacts between European bison and cattle is dependent on the distance of cattle pastures from human settlements was confirmed. European bison avoid human infrastructure, including settlements, as shown in previous studies [65–67]. Human settlements are therefore an important factor in reintroduction plans for this species [68,69]. Even more surprising was that the chance of potential contacts throughout the year was confirmed, not just in spring and fall. Nevertheless, the greatest risk of contact was still associated with the spring months, when the cattle are on the pastures and European bison are still outside the forest complex, and the fall months, when cattle are still on the pastures and European bison are already outside the forest complex. The temporal intensity of the pathogen transmission pattern depends on the wildlife species and cattle management strategy [70–73]. Therefore, temporal change in risk should be considered in the field and in the context of wildlife behavior. However, it is important to evaluate wildlife management methods, because the highest risk of contacts between European bison and cattle was found in the Białowieska Forest and the Bieszczady Mountains, i.e., in the most numerous European bison populations in Poland [53]. This was also partly confirmed by the differences

in risk perception for cattle (as well as humans), with the lower risk found in breeders from villages around the Borecka Forest.

Our findings suggest that it is possible to minimize the contacts between European bison and cattle by changing management practices. One important mechanism is to keep grazing areas as close as possible to settlements, which can significantly limit the possibility of direct or indirect contact between European bison and cattle. It may be possible to minimize the potential contacts by shortening cattle grazing time in pastures. It should be kept in mind that pathogen transmission between European bison and cattle is possible even in regions where European bison do not move beyond forest complexes and do not cause significant damage to agriculture. However, the risk seems to be greater when European bison populations are large and dispersal beyond forest complexes becomes the norm for these populations, especially when cattle are grazed in large numbers.

## Supporting information

**S1 Table. Main data obtained from the questionnaires.**  
(DOCX)

## Acknowledgments

Authors thank Piotr Stocki, Tomasz Piotrowski for invaluable help in conducting the surveys.

## Author Contributions

**Conceptualization:** Daniel Klich.

**Formal analysis:** Daniel Klich, Magdalena Perlińska-Teresiak.

**Funding acquisition:** Wanda Olech.

**Investigation:** Daniel Klich, Anna Didkowska, Magdalena Perlińska-Teresiak, Aleksandra Wołoszyn-Gałęza, Krzysztof Żoch, Marek Balcerak.

**Methodology:** Daniel Klich.

**Project administration:** Daniel Klich.

**Supervision:** Daniel Klich.

**Visualization:** Daniel Klich.

**Writing – original draft:** Daniel Klich, Anna Didkowska, Anna M. Pyziel-Serafin.

**Writing – review & editing:** Magdalena Perlińska-Teresiak, Aleksandra Wołoszyn-Gałęza, Krzysztof Żoch, Marek Balcerak, Wanda Olech.

## References

1. Olech W, Perzanowski K, European Bison (*Bison bonasus*) Strategic Species Status Review 2020. IUCN SSC Bison Specialist Group and European Bison Specialist Group, 2022. Available at <https://www.iucn.org/commissions/ssc-groups/mammals/mammals-a-e/bison>.
2. Plumb G, Kowalczyk R, Hernandez-Blanco JA, *Bison bonasus*. The IUCN Red List of Threatened Species 2020. <https://dx.doi.org/10.2305/IUCN.UK.2020-3.RLTS.T2814A45156279.en>. Accessed on 10 June 2022.
3. Olech W, Klich D, Perzanowski K, Development of a new Action Plan for the European bison. *Oryx* 53 (2), 214–214, 2019. <https://doi.org/10.1017/S0030605318001369>
4. Perzanowski K, Klich D, Olech W, European Union needs urgent strategy for the European bison. *Conservation Letters*, in press, 2022. <https://doi.org/10.1111/conl.12923>.

5. McCallum H., Barlow N. and Hone J., 2001. How should pathogen transmission be modelled? *Trends in ecology & evolution*, 16(6), pp.295–300. [https://doi.org/10.1016/s0169-5347\(01\)02144-9](https://doi.org/10.1016/s0169-5347(01)02144-9) PMID: 11369107
6. Filip-Hutsch K, Laskowski Z, Myczka AW, Czopowicz M, Moskwa B, Demiaszkiewicz AW, The occurrence and molecular identification of *Thelazia* spp. In European bison (*Bison bonasus*) in the Bieszczady Mountains. *Scientific Reports* 2022, 12:22508.
7. Welz M., Anusz K., Salwa A., Zaleska M., Bielecki W., Osinska B., et al. Gruzlica bydłca u żubrów w Bieszczadach. *Med Weter.* 2005, 61, pp. 441–444.
8. Otranta D, Traversa D, *Thelazia* eyeworm: an original endo- and ecto-parasitic nematode. *Trends in Parasitology* 21, no1, January 2005.
9. Demiaszkiewicz AW, Moskwa B, Gralak A, Laskowski Z, Myczka AW, Kołodziej-Sobocińska M, et al., The Nematodes *Thelazia gulosa* Railliet and Henry, 1910 and *Thelazia skrjabini* Erschov, 1928 as a Cause of Blindness in European Bison (*Bison bonasus*) in Poland. *Acta Parasitol.* 2020, Dec; 65 (4):963–968. <https://doi.org/10.1007/s11686-020-00243-w> PMID: 32613456
10. Kowalczyk R, Krasieńska M, Kamiński T, Górny M, Struś P, Hofman-Kamińska E, et al., Movements of European bison (*Bison bonasus*) beyond the Białowieża Forest (NE Poland): range expansion or partial migrations? *Acta theriol.* 2013, 58(4), 391–401. <https://doi.org/10.1007/s13364-013-0136-y>.
11. Sobczuk M, Olech W, Damage to the crops inflicted by European bison living in the Knyszyn Forest. *European Bison Conservation Newsletter.* 2016, 9, 39–48.
12. Klich D, Łopucki R, Stachniuk A, Sporek M, Fornal E, Wojciechowska M, et al., Pesticides and conservation of large ungulates: Health risk to European bison from plant protection products as a result of crop depredation. *PLoS ONE.* 2020 15(1). <https://doi.org/10.1371/journal.pone.0228243> PMID: 31999727
13. Klich D, Kitowski I, Łopucki R, Wiącek D, Olech W, Essential differences in the mineral status of free-ranging European bison *Bison bonasus* populations in Poland: The effect of the anthroposphere and lithosphere. *Sci Total Environ.* 2021, 757. <https://doi.org/10.1016/j.scitotenv.2020.143926>.
14. Gortázar C, Ferroglio E, Höfle U, Diseases shared between wildlife and livestock: a European perspective. *Eur J Wildl Res.* 2007; 53, 241. <https://doi.org/10.1007/s10344-007-0098-y>.
15. Delahay RJ, de la Fuente J, Smith GC, Sharun K, Snary EL, Flores Girón L, et al., Assessing the risks of SARS-CoV-2 in wildlife. *One Health Outlook.* 2021; Apr 7; 3:7. <https://doi.org/10.1186/s42522-021-00039-6> PMID: 33834160
16. Miller RS, Farnsworth ML, Malmberg JL. Diseases at the livestock-wildlife interface: status, challenges, and opportunities in the United States. *Prev Vet Med.* 2013 Jun 1; 110(2):119–32. <https://doi.org/10.1016/j.prevetmed.2012.11.021> Epub 2012 Dec 14. PMID: 23254245; PMCID: PMC7127607.
17. Godfrey SS. Networks and the ecology of parasite transmission: A framework for wildlife parasitology. *Int J Parasitol Parasites Wildl.* 2013 Sep 18; 2:235–45. <https://doi.org/10.1016/j.ijppaw.2013.09.001> PMID: 24533342; PMCID: PMC3862525.
18. Serrano E, Cross PC, Beneria M, Ficapal A, Curia J, Marco X, Lavín S, Marco I. Decreasing prevalence of brucellosis in red deer through efforts to control disease in livestock. *Epidemiol Infect.* 2011 Oct; 139 (10):1626–30. <https://doi.org/10.1017/S0950268811000951> PMID: 21676351
19. Cross PC, Edwards WH, Scurlock BM, Maichak EJ, Rogerson JD. Effects of management and climate on elk brucellosis in the Greater Yellowstone Ecosystem. *Ecol Appl.* 2007 Jun; 17(4):957–64. <https://doi.org/10.1890/06-1603> PMID: 17555209
20. Wobeser G. Bovine tuberculosis in Canadian wildlife: an updated history. *Can Vet J.* 2009 Nov; 50 (11):1169–76. <https://doi.org/10.1371/journal.pone.0002776> PMID: 20119541; PMCID: PMC2764465.
21. Hardstaff JL, Marion G, Hutchings MR, White PC. Evaluating the tuberculosis hazard posed to cattle from wildlife across Europe. *Res Vet Sci.* 2014 Oct; 97 Suppl:S86–93. <https://doi.org/10.1016/j.rvsc.2013.12.002> Epub 2013 Dec 15. PMID: 24423727.
22. Meunier NV, Sebulime P, White RG, Kock R. Wildlife-livestock interactions and risk areas for cross-species spread of bovine tuberculosis. *Onderstepoort J Vet Res.* 2017 Jan 23; 84(1):e1–e10. <https://doi.org/10.4102/ojvr.v84i1.1221> PMID: 28155286; PMCID: PMC6238759.
23. Sichewo PR, Etter EMC, Michel AL. Wildlife-cattle interactions emerge as drivers of bovine tuberculosis in traditionally farmed cattle. *Prev Vet Med.* 2020 Jan; 174:104847. <https://doi.org/10.1016/j.prevetmed.2019.104847> Epub 2019 Nov 13. PMID: 31786405.
24. Brahmabhatt DP, Fosgate GT, Dyason E, Budke CM, Gummow B, Jori F, Ward MP, Srinivasan R. Contacts between domestic livestock and wildlife at the Kruger National Park Interface of the Republic of South Africa. *Prev Vet Med.* 2012 Jan 1; 103(1):16–21. <https://doi.org/10.1016/j.prevetmed.2011.08.003> PMID: 21907434

25. Georgiadis NJ, Olwero J, Ojwang G, Romanch SS, Savanna herbivore dynamics in a livestock-dominated landscape: I. Dependence on land use, rainfall, density, and time. *Biol Conserv* 2007, 137:461–472.
26. Kinnaird MF, O'Brien TG Effects of Private-Land Use, Livestock Management, and Human Tolerance on Diversity, Distribution, and Abundance of Large African Mammals. *Conserv Biol* 2012, 26:1026–1039. <https://doi.org/10.1111/j.1523-1739.2012.01942.x> PMID: 23082891
27. Ogutu JO, Piepho H-P, Said MY, Ojwang GO, Njino LW, Kifugo SC, et al. Extreme wildlife declines and concurrent increase in livestock numbers in Kenya: What are the causes? *PloS One* 2016, 11: e0163249. <https://doi.org/10.1371/journal.pone.0163249> PMID: 27676077
28. Allen AR, Ford T, Skuce RA, Does *Mycobacterium tuberculosis var. bovis* Survival in the Environment Confound Bovine Tuberculosis Control and Eradication? A Literature Review. *Vet Med Int.* 2021; Feb 5; 2021:8812898. <https://doi.org/10.1155/2021/8812898>
29. Walsh CM, Gebert MJ, Delgado-Baquerizo M, Maestre FT, Fierer N, A Global Survey of Mycobacterial Diversity in Soil. *Appl Environ Microbiol.* 2019; 85(17). <https://doi.org/10.1128/AEM.01180-19> PMID: 31253672
30. Sichewo PR, Vander Kelen C, Thys S, Michel AL, Risk practices for bovine tuberculosis transmission to cattle and livestock farming communities living at wildlife-livestock-human interface in northern KwaZulu Natal, South Africa. *PLoS neglected tropical diseases.* 2020; 14(3). <https://doi.org/10.1371/journal.pntd.0007618> PMID: 32226029
31. Martínez-Guijosa J, Lima-Barbero JF, Acevedo P, Cano-Terriza D, Jiménez-Ruiz S, Barasona JÁ, et al., Description and implementation of an On-farm Wildlife Risk Mitigation Protocol at the wildlife-livestock interface: Tuberculosis in Mediterranean environments. *Prev Vet.* 2021; Med 191 <https://doi.org/10.1016/j.prevetmed.2021.105346> PMID: 33895501
32. Kęsik-Maliszewska J, Krzysiak MK, Grochowska M, Lechowski L, Chase C, Larska M, Epidemiology of Schmallenberg Virus in European Bison (*Bison bonasus*) in Poland. *J Wildl Dis.* 2018; Apr; 54(2):272–282. <https://doi.org/10.7589/2017-07-159> PMID: 29148884
33. Krzysiak MK, Iwaniak W, Kęsik-Maliszewska J, Olech W, Larska M, Serological Study of Exposure to Selected Arthropod-Borne Pathogens in European Bison (*Bison bonasus*) in Poland. *Transboundary and emerging diseases.* 2017; 64(5) 1411–1423. <https://doi.org/10.1111/tbed.12524>.
34. Krzysiak MK, Jabłoński A, Iwaniak W, Krajewska M, Kęsik-Maliszewska J, Larska M, Seroprevalence and risk factors for selected respiratory and reproductive tract pathogen exposure in European bison (*Bison bonasus*) in Poland. *Vet microbiol.* 2018; 215, 57–65. <https://doi.org/10.1016/j.vetmic.2018.01.005>.
35. Kwiecień E., Stefańska I., Kizerwetter-Świda M., Chrobak-Chmiel D., Didkowska A., Bielecki, et al., Prevalence and Genetic Diversity of *Trueperella pyogenes* Isolated from Infections in European Bison (*Bison bonasus*). *Animals.* 2022; 12(14), p.1825. <https://doi.org/10.3390/ani12141825> PMID: 35883372
36. Karbowski G, Demiaszkiewicz A, Pyziel A, Wita I, Moskwa B, Werszko J, et al., The parasitic fauna of the European bison (*Bison bonasus*) (Linnaeus, 1758) and their impact on the conservation. Part 2 The structure and changes over time. *Acta Parasitol.* 2014; 59(3): 372–379. <https://doi.org/10.2478/s11686-014-0253-z>.
37. Pyziel AM, Molecular analysis of lungworms from European bison (*Bison bonasus*) on the basis of small subunit ribosomal RNA gene (SSU). *Acta parasitol.* 2014; 59(1), 122–125. <https://doi.org/10.2478/s11686-014-0219-1>.
38. Pyziel AM, Demiaszkiewicz AW, Klich D, Laskowski Z, A morphological and molecular comparison of *Eimeria bovis*-like oocysts (Apicomplexa: *Eimeriidae*) from European bison, *Bison bonasus* L., and cattle, *Bos taurus* L., and the development of two multiplex PCR assays for their identification. *Vet Parasitol.* 2019; 275. <https://doi.org/10.1016/j.vetpar.2019.08.011>.
39. Pyziel AM, Demiaszkiewicz AW, *Sarcocystis cruzi* (Protozoa: Apicomplexa: *Sarcocystiidae*) u żubra (*Bison bonasus*) w Puszczy Białowieskiej [*Sarcocystis cruzi* (Protozoa: Apicomplexa: *Sarcocystiidae*) infection in European bison (*Bison bonasus*) from Białowieża Forest, Poland]. *Wiadomości parazytologiczne.* 2009; 55(1), 31–34.
40. Majewska AC, Werner A, Cabaj W, Moskwa B, The first report of *Toxoplasma gondii* antibodies in free-living European bison (*Bison bonasus bonasus* Linnaeus). *Folia parasitol.* 2014; 61(1), 18–20.
41. Cabaj W, Grzelak S, Moskwa B, Bień-Kalinowska J, *Sarcocystis cruzi* infection in free-living European bison (*Bison bonasus bonasus* L.) from the Białowieża Forest, Poland—A molecular analysis based on the *cox1* gene. *Int J Parasitol Parasites Wildl.* 2021; Jul 31; 16:59–63. <https://doi.org/10.1016/j.ijppaw.2021.07.010> PMID: 34458088
42. Didkowska A, Klich D, Hapanowicz A, Orłowska B, Gałązka M, Rzewuska M, et al., Pathogens with potential impact on reproduction in captive and free-ranging European bison (*Bison bonasus*) in Poland

- a serological survey. BMC Vet Res. 2021; Nov 4; 17(1):345. <https://doi.org/10.1186/s12917-021-03057-8> PMID: 34736464
43. Walker JG, Morgan RR, Generalists at the interface: Nematode transmission between wild and domestic ungulates. Int J Parasitol Parasites Wildl. 2014; 3, 242–250. <https://doi.org/10.1016/j.ijppaw.2014.08.001> PMID: 25426420
  44. Drózd J, A study on helminth and helminthiases in bison, *Bison bonasus* (L.) in Poland. Acta Parasitol Pol. 1961; 9(1/9), 55–95.
  45. Pyziel AM, Björck S, Wiklund R, Skarin M, Demiaszkiewicz AW, Höglund J, Gastrointestinal parasites of captive European bison *Bison bonasus* (L.) with a sign of reduced efficacy of *Haemonchus contortus* to fenbendazole. Parasitol Res. 2018; 117(1), 295–302. <https://doi.org/10.1007/s00436-017-5663-z>.
  46. Vadlejch J, Kyrianova IA, Rylkova K, Zikmund M, Langrova I, Health risks associated with wild animal translocation: a case of the European bison and an alien parasite. Biol Inv. 2016; 19, 1121–1125. <https://doi.org/10.1007/s10530-016-1306-z>.
  47. Drózd J, Demiaszkiewicz AW, Lachowicz J, Expansion of the Asiatic parasite *Ashworthius sidemi* (Nematoda, Trichostrongylidae) in wild ruminants in Polish territory. Parasitol Res. 2003; Jan; 89(2):94–7. <https://doi.org/10.1007/s00436-002-0675-7> PMID: 12489006
  48. Pyziel AM, Demiaszkiewicz AW, Observations on sporulation of *Eimeria bovis* (Apicomplexa: Eimeriidae) from the European bison *Bison bonasus*: effect of temperature and potassium dichromate solution. Folia Parasitol. 2015; 62, 2015.020. <https://doi.org/10.14411/fp.2015.020>.
  49. Pyziel AM, Laskowski Z, Demiaszkiewicz AW, Höglund J, Interrelationships of *Dictyocaulus* spp. in Wild Ruminants with Morphological Description of *Dictyocaulus cervi* n. sp. (Nematoda: Trichostrongyloidea) from Red Deer, *Cervus elaphus*. J Parasitol. 2017; 103(5), 506–518. <https://doi.org/10.1645/16-75>.
  50. Pyziel AM, Laskowski Z, Dolka I, Kołodziej-Sobocińska M, Nowakowska J, Klich D, et al., Large lungworms (Nematoda: Dictyocaulidae) recovered from the European bison may represent a new nematode subspecies. Int J Parasitol Parasites Wildl. 2020; 13, 213–220. <https://doi.org/10.1016/j.ijppaw.2020.10.002>.
  51. Wilkinson D, Bennett R, McFarlane I, Rushton S, Shirley M, Smith GC, Cost-benefit analysis model of badger (*Meles meles*) culling to reduce cattle herd tuberculosis breakdowns in Britain, with particular reference to badger perturbation. J Wildl Dis, 2009; 45(4), 1062–1088. <https://doi.org/10.7589/0090-3558-45.4.1062>.
  52. Gortazar C, Diez-Delgado I, Barasona JA, Vicente J, De La Fuente J, Boadella M, The Wild Side of Disease Control at the Wildlife-Livestock-Human Interface: A Review. Front Vet Sci, 2015, 1, 27. <https://doi.org/10.3389/fvets.2014.00027> PMID: 26664926
  53. Raczyński J, The European Bison Pedigree Book 2021. Białowieża National Park. Poland.
  54. Olech W, Sobczuk M, Zalewski D, Szkody powodowane przez żubry w lasach i uprawach rolnych. In: Straty i szkody wyrządzane przez dzikie zwierzęta w gospodarce rolnej, leśnej i rybackiej. 2018; pp.67–76.
  55. Gielarek S, Klich D, Antosiewicz M, Forest cover change in Western Bieszczady Mts. in 19 th and 20 th century. Sylwan. 2011; 155 (12): 835–842 <https://doi.org/10.26202/sywan.2011073>
  56. Perzanowski K, Januszczak M, Wołoszyn-Gałęza A, Klich D, Wieloletnia dynamika arealu populacji żubrów *Bison bonasus*, na terenie nadleśnictw bieszczadzkich. Sylwan. 2021; 65(1), 41–49. <http://doi.org/10.26202/sywan.202010>.
  57. Nieszafa A, Klich D, Perzanowski K, Januszczak M, Wołoszyn-Gałęza A, Olech-Piasecka W, Debarking intensity of European bison in the Bieszczady Mountains in relation to forest habitat features. For Ecol Manage. 2022; 508, 1–10. <http://doi.org/10.1016/j.foreco.2022.120057>.
  58. Klich D, Łopucki R, Perlińska-Teresiak M, Lenkiewicz-Bardzińska A, Olech W, Human-Wildlife Conflict: The Human Dimension of European Bison Conservation in the Bieszczady Mountains (Poland). Animals. 2021; 11(2), 503. <https://doi.org/10.3390/ani11020503> PMID: 33671922
  59. Atkinson R, Flint J, Accessing hidden and hard-to-reach populations: Snowball research strategies. Soc Res Update. 2001; 33.
  60. GUS, National Agricultural Census 2020. Report on the results. Warsaw 2021.
  61. <https://stat.gov.pl/regon-teryt/>.
  62. Pyziel AM, Józwickowski M, Demiaszkiewicz AW, Coccidia (Apicomplexa: Eimeriidae) of the lowland European bison *Bison bonasus bonasus* (L.). Vet Parasitol. 2014; 202(3–4), 138–144. <https://doi.org/10.1016/j.vetpar.2014.03.014>.
  63. Pyziel AM, Kowalczyk R, Demiaszkiewicz AW, The annual cycle of shedding *Eimeria* oocysts by European bison (*Bison bonasus*) in the Białowieża Primeval Forest, Poland. J Parasitol. 2011; 97(4), 737–739. <https://doi.org/10.1645/GE-2567.1>.

64. Nazni WA, Luke H, Wan Rozita WM, Abdullah AG, Sa'diyah I, Azahari AH, et al., Determination of the flight range and dispersal of the house fly, *Musca domestica* (L.) using mark release recapture technique. *Trop biomed*. 2005; 22(1), 53–61.
65. Kuemmerle T, Perzanowski K, Akçakaya HR, Beaudry F, Van Deelen TR, Parnikoza I, et al., Cost-effectiveness of strategies to establish a European bison metapopulation in the Carpathians. *J Appl Ecol*. 2011; 48: 317–329. <https://doi.org/10.1111/j.1365-2664.2010.01954.x>.
66. Kuemmerle T, Perzanowski K, Chaskovskyy O, Ostapowicz K, Halada L, Bashta AT, et al., European bison habitat in the Carpathian Mountains. *Biol conserv*. 2010; 143(4), pp. 908–916. <https://doi.org/10.1016/j.biocon.2009.12.038>.
67. Ziólkowska E, Perzanowski K, Bleyhl B, Ostapowicz K, Kuemmerle T, Understanding unexpected reintroduction outcomes: Why aren't European bison colonizing suitable habitat in the Carpathians? *Biol Conserv*. 2016; 195, pp.106–117. <https://doi.org/10.1016/j.biocon.2015.12.032>.
68. Perzanowski K, Olech W, Kozak I, Constraints for re-establishing a meta-population of the European bison in Ukraine. *Biol Conserv*. 2004; 120(3), pp.345–353. <https://doi.org/10.1016/j.biocon.2004.03.006>.
69. Dănilă G, Cătănoiu S, Simioniuc V, Roșca S, The Reintroduction Analysis of European Bison (*Bison bonasus* L., 1758) in the North of Romania and the Identification of the Most Favourable Locations. *For-ests*. 2022; 13(6):920. <https://doi.org/10.3390/f13060920>.
70. Brook RK, McLachlan SM, Transdisciplinary habitat models for elk and cattle as a proxy for bovine tuberculosis transmission risk. *Prev Vet Med*. 2009; Oct 1; 91(2–4):197–208. <https://doi.org/10.1016/j.prevetmed.2009.05.021> PMID: 19541377
71. Findholt S, Johnson B, Damiran D, DelCurto T, Kie J, Diet composition, dry matter intake, and diet overlap of mule deer, elk, and cattle. *Transactions of the 69th North American Wildlife and Natural Resources Conference*. 2004; p. 670–686.
72. Berentsen AR, Miller RS, Misiewicz R, Malmberg JL, Dunbar MR, Characteristics of white-tailed deer visits to cattle farms: implications for disease transmission at the wildlife–livestock interface. *Eur J Wildl Res*. 2014; 60(2), pp.161–170 <https://doi.org/10.1007/s10344-013-0760-5>.
73. Payne A, Chappa S, Hars J, Wildlife visits to farm facilities assessed by camera traps in a bovine tuberculosis-infected area in France. *Eur J Wildl Res*. 2016; 62, 33–42. <https://doi.org/10.1007/s10344-015-0970-0>.
